# Supplementary material
Source: Springer Nature journal article supplement (https://www.springermedizin.de/resource/supplementary/12916_2012_664_MOESM2_ESM.pdf/9598018)

| Study or Subgroup | Std. Mean Difference<br>IV, Fixed, 95% CI | Std. Mean Difference<br>IV, Fixed, 95% CI |
|-------------------|-------------------------------------------|-------------------------------------------|
|-------------------|-------------------------------------------|-------------------------------------------|

### 2.1.1 Time

|                         |                   |
|-------------------------|-------------------|
| Gonzalez-Alonso (1999)a | 2.01 [0.65, 3.38] |
| Hasegawa (2006)b        | 1.41 [0.35, 2.47] |
| Siegel (2012)c          | 1.48 [0.34, 2.62] |

### 2.1.2 Distance

|               |                    |
|---------------|--------------------|
| Booth (1997)d | 0.61 [-0.40, 1.62] |
| Kay (1999)e   | 0.42 [-0.64, 1.49] |

### 2.1.3 Mean Power Output

|                  |                    |
|------------------|--------------------|
| Duffield (2010)f | 0.74 [-0.28, 1.77] |
|------------------|--------------------|

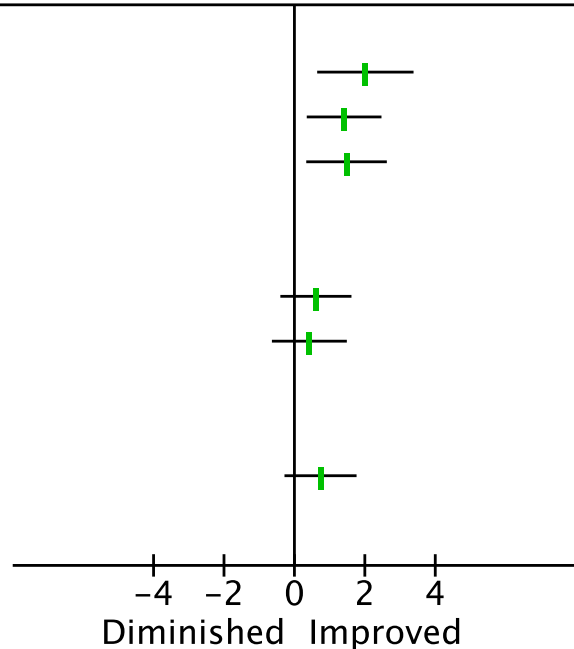

Supplement: MOESM2 [file 9598018]
